## **Body Shaming vs. Body Positivity:**

### **Exploring What Words Hurt and What Words Heal**

Valerie Wansink  
Lansing Central School District

Brian Wansink, PhD  
Retired, Cornell University

2-28-23

#### **Abstract**

What can a health professional say to a bullied and body shamed child? This research elicited and categorized the words that were reported as being most memorably hurtful and helpful to 341 young people (79.5% female; average age 25.03 years) who had been body shamed. The most memorably hurtful comments generally involved either vivid comparisons or derogatory nicknames. Fortunately, the supportive words of health professionals, peers, and parents can heal. They include 1) *reframing comments* that redirect attention to positive features (such as feminine, healthy, etc.), 2) *impact-related comments* that emphasize how a physical feature influences or is admired by other people (such one's eyes or smile that "lights up the room"), and 3) *identity-related comments* that redefine one's physical identify or self-concept (such as striking or mesmerizing). Knowing the type of words that were helpful in healing can be useful to healthcare professionals as well as parents and peers.

## **Body Shaming vs. Body Positivity:**

### **Exploring What Words Hurt and What Words Heal**

Body shaming, fat shaming, and weight bullying can have a dramatic impact on a person's self-esteem (1,2). A key question in this exploratory research is what are types of name calling or verbal bullying are most likely to have a long-lasting negative impact on a young person (3), and what types of comments can be made by a supporter – a health professional, parent, or peer – to help counterbalance or temper this impact? In short, what words hurt and what words heal.

Body shaming can cause lasting psychologically damage (4). Although this can happen at all ages (5), it may be most pronounced and harmful when a person is young (6,7).

Body shaming and bullying is correlated with low self-esteem, poor school performance, absenteeism, self-handicapping, and even suicide (4,8), and being bullied as a child is a powerful predictor of exaggerated weight gain in some people (9). Shaming and bullying is no longer just a problem in middle and high school (10) because it now extends to the internet and to social networking sites (11). It has a 24/7 impact.

Research has not yet codified the actual types of words that are most memorably painful to a person (12), nor have they codified the types of words that have been most helpful to their recovery. Knowing this could inform potential supporters – health professionals, parents, or peers – on how to help a bullied person better counter (13) and cope (14) with

body shaming. Moreover, these findings can be useful to the peer or parent who is asking themselves “What do I say?” or “How can I help?”

To help answer these questions, a survey targeted at body shamed individuals asked them to explain what was said to them that was most hurtful and what did supporters say to them that was most helpful in their healing process. After analyzing these open-ended answers, the results are discussed with an eye toward how they might be used to guide health professionals to help a young person who has been body shamed or fat bullied.

## **Background**

Words hurt, but it is not clear what words hurt the most (15). Whereas experimental research shows that even short-term teasing can negatively alter one’s mood (16), more intense and malicious verbal bullying could last for many years (17). It can lead to shame (18), stress (19), eating disorders (20), obesity (9), binge eating (21), and depression (22). This can affect all genders and is believed to be both more prevalent and more serious than in the past (1) due to the large prevalence of 24/7 social media (23).

Being bullied can negatively change one’s self-concept (15). There are a number of key dimensions of a person’s self-concept (5) and there are several ways adolescents define themselves and their identity (18, 24). For instance, they might define themselves as a debater, a clarinet player, a diligent student, or as a loyal friend. Alternatively, if a person has been ridiculed by their weight or height, they may come to define themselves mostly by this physical trait, and not by positive descriptions of themselves, such as their

social skills, or other talents (25–29). Such “self-talk” could also tend to negatively influence life decisions they make.

This exploratory research investigates these questions, starting with “What types of words hurt the most?” In looking toward gender-inclusive solutions, we also determine what type of words could be useful to those supporters who want to help. That is, we examine what types of words help the most?

## **Method**

An online omnibus survey was targeted at recent high school graduates (18 years and older). They were recruited through a news release that described the purpose of the study and which was sent to youth health and lifestyle bloggers. A survey link was provided to bloggers and to others who circulated this link through social media and through email lists. These bloggers and list managers then promoted the topic and the link in ways that were intended to attract people who were familiar with body shaming.

Upon arriving to the survey’s website, visitors were told “You are invited to participate in a research study that seeks to understand the issue of body shaming (the action or practice of humiliating someone by mocking or making critical comments about their physical appearance) among young adults and how to preempt, cope, and stop it.” Those who indicated they were 18 years or older and who signed their consent were then allowed to begin the survey. The survey and study had Institutional Review Board approval from

Cornell University.

The questions generally referred to body shaming that occurred in adolescence (middle school or high school). Of those people who completed most or all of the survey, 61.4% were between 18-22. This was the targeted age range because it has been the general age-range in cyber bullying and teasing research (30). It was believed that their initial experiences with body shaming would be recent enough to be remembered, but distant enough to allow for reflection (31).

They were asked open-ended questions about their specific experiences with body shaming, including the hurtful comments that were made as well as the helpful comments given by supporters. They were also asked exploratory close-ended questions, such as their familiarity with the term “body shaming,” and they were asked to indicate what level of body shaming they had experienced as an adolescent.

Of the 341 people who started the survey, 166 (48.7%) completed all or most of the survey. The median time spent on the survey was around 10 minutes, and those who provided the most in-depth open-ended responses took the most time with the survey. Of those completing the survey, 79.5% identified as females, one as transgender, and the rest as males. The average age of those completing the survey was 25.03 years (ranging from 18-62).

Based on the responses of all genders and ages, we developed an inclusive coding system

so the comments of the respondents could be content analyzed and then categorized into discrete categories. A Q-sort procedure was used to determine the coding categories for each open-ended question. After determining these coding categories, two coders in the age range of interest coded the open-ended responses. Any resulting disagreement between the two coders final responses was then discussed and resolved.

## Results

Inclusive coding categories were developed for both hurtful and helpful comments. Categories of hurtful comments included vivid comparisons and derogatory nicknames. In contrast, categories of helpful comments included reframing comments, impact-related comments, and identity-related comments. After first examining the physical features targeted by attackers and supporters, we will then focus on the types of comments that were most memorably hurtful and helpful.

### **The Physical Features Most Mentioned by Attackers and by Supporters**

Of initial interest are the specific physical features mentioned by attackers and those specific physical features mentioned by supporters. As Table 1 indicates, most of hurtful body shaming comments were targeted at being fat (25.2%), short (8.5%), or skinny (7.1%). In total, nearly a third (32.3%) of the most hurtful comments specifically focused on a person's weight, and four out of five (78.0%) were about being overweight.

Interestingly, people who had been body shamed also vividly remembered the positive

words that supporters had mentioned – in some cases nearly 50 years ago. The most common category focused on positive physical features *unrelated* to those that were bullied – such as eyes (18.1%) or smile (11.4%), which (along with teeth and lips) comprised nearly a third (31.9%) of all the most positively remembered physical features.

---

**Table 1:**  
**The Physical Features Most Mentioned by Attackers and by Supporters**

---

**Body Shamed Features Most Targeted by Attackers**

- Overweight – 25.2%
- Height – 8.5%
- Legs -- 7.8%
- Underweight – 7.1%
- Stomach – 3.9%
- Skin – 2.6%
- Hair, Breasts, Buttocks, or Hair – each 1.9%
- Hips or Body Hair – each 1.3%

**Positive Features Most Frequently Mentioned by Supporters**

- Eyes – 18.1%
  - Smile – 11.4%
  - Legs – 8.4%
  - Body – 7.2%
  - Hair – 6.0%
  - Toned/Muscles – 4.8%
  - Skin – 3.6%
  - Healthy – 3.0%
  - Handsome – 2.4%
  - Athletic – 1.8%
  - Teeth and Lips – each 1.2%
-

## **Hurtful Negative Comments Include Exaggerated Comparisons**

One category of hurtful comments that stood out were those that made an exaggerated comparison or analogy about the specific physical trait it targeted. These included comparing a person's size to that of a whale, comparing one's thighs to trees, or one's stomach to that of a pregnant woman. Although these comments about being overweight comprised 25.2% of all comments, 7.1% were shamed and bullied for being underweight, such as being compared to a skeleton or as having "chicken skinny" legs (see Tables 1 and 2). For instance, one girl remembered people describing her like a board, saying "They said they can't tell the difference between my front and back because I am quite skinny and have few curves."

A second common category of body shaming that was commonly mentioned included derogatory nicknames (see Table 2). This category frequently included alliterative names like Buddha Belly or references to popular culture (Hairy Potter). One person recalled being called "Chihuahua" because they were short and Mexican American.

Hurtful comments were sometimes specified as coming from a relative or from an admired person. These included a father insensitively joking about a girl's hair, a mother commenting on breasts, or a brother teasing about weight. One girl hurtfully recalled a time "When the boys in 7th grade called me "whale" relentlessly. These were boys I had crushes on."



---

**Table 2:**  
**Categories and Illustrations of Memorable Negative Comments**

---

### **1) Exaggerated Comparisons**

- That I am even bigger than a man
- “You have bigger thighs than me” (it was a guy)
- “You look like a fullback”
- That I look like a skeleton
- “You look like you're pregnant”
- Chicken skinny

### **2) Derogatory Nicknames**

- Tubby-tubby two by four
- Bubble Butt
- I was called ‘Chihuahua’ because I'm short and Mexican American
- Hairy monkey
- Buddha Belly

### **3) Other Examples of Hurtful Comments**

- I'm too fat for any guy to be attracted to me
  - "We met our fat chick quota already"
  - That you can't tell the difference between my front and back because  
I am quite skinny and have few curves.
  - When the boys in 7th grade called me “whale” relentlessly. These were boys  
I had crushes on.
-

## Helpful Positive Comments Include Reframing and Redirecting

One type of memorable or helpful comment were *reframing comments*, which reframed the physical feature that had been attacked. It did not deny what was said but instead reframed it by focusing on one's "hourglass" figure, one's muscle tone, or as one being "healthy" or "athletic." In addition to reframing, other memorable comments specifically redirected one's focus onto physical features that were *unrelated* to the features that was shamed. As Table 1 indicated, the most frequently mentioned examples of this were a person's eyes and smile.

A second category of helpful comments were *impact-related comments* that emphasized how a person's features impact other people in a positive way. These included comments such as how a person's smile, eyes, or laugh was "contagious," "infectious," "lit up a room," or "radiated joy." It also included comments that showed that they had traits that other people envied or wished they had (such as "I wish I had your eyes"). For examples, being told you have a wonderful smile might be memorable partly because of who said it. One person said, "My husband always describes me to others as the pretty girl with the big smile." Another person simply said, "My father complimented my smile." These were very simple but helpful comments coming from an important person.

A third category of memorable comment were *identity-related comments* that generally centered on a single, evocative word that reinforced their an overlooked part of their identity more than a specific physical feature. That is, they were "mesmerizing,"

“striking,” “exotic,” or “feminine.” Even though these were often stated in conjunction with other words (“mesmerizing beauty”), they were seen by a person as a more general part of a positive identity. Whereas the adjectives in the negative body shaming comments were general and not creative (such as “really fat” or “very short”), the positively remembered comments were more vivid, creative, or artfully used. Some became a tent pole that reinforced a new, positive identity.

---

**Table 2.**

**Categories and Illustrations of Memorable Positive Comments**

---

**1) Reframing Comments**

- Curvy/Hourglass/Voluptuous
- Toned/Muscular
- Healthy
- Athletic

**2) Impact-related Comments**

- “Your smile is contagious. Your smile just radiates joy”
- “Your eyes are captivating and infectious”
- “I wish I had your body/eyes/smile”

**3) Identity-related Comments**

- I have an *exotic* appearance
- That my beauty was *mesmerizing*
- I am *striking* looking.
- “You have a really *bright* smile or *feminine* hands”

#### 4) Other Examples of Helpful Positive Comments

- I still have that unique beauty from childhood
  - That I'm not too fat, and I'm not too skinny. I'm just right
  - My chest was very powerful and very sexy
  - “Wow your abs look good, I can tell you really work for them.”
  - Someone said I reminded them of a very pretty celebrity.
- 

### Discussion

As an exploratory study, this usefully specifies and classifies the types of hurtful phrases used in body shaming and bullying, but it also uniquely classifies and provides examples of helpful and memorable phrases. By doing so, it provides a foundation to motivate new research in these areas of hurtful remarks and helpful remarks.

Words hurt, and these preliminary findings show that some types of words leave a more vivid and lasting pain. Follow-up discussions indicated it was not only a general label that hurt (fat, short, skinny, and so on) but it was also derogatory nicknames (Thunder Thighs) and vivid comparisons (whale and Buddha Belly) that were especially painful, possibly because they are very personal, very specific, and they can be easily triggered in a wide variety of ways. That is, the mention of a Harry Potter movie can trigger “Hairy Potter” to mind, or the mention of “whale watching” can trigger a memory of being called a whale and hearing someone make whale imitations during school lunch.

An encouraging insight from these findings is they also suggest what a health professional, parent, or peer might say to help counter the body shaming messages.

Table 3 usefully presents the types of positive phrases that have tended to stick with people over the years. One strategy can be to *reframe negative words* (see Appendix) to focus on new or unrelated physical features. A second strategy can be to make *impact-related comments* that emphasize how a physical feature influences others (such one’s eyes or smile that “lights up the room”). A third strategy can be to use *identity-related comments* that can positively redefine one’s physical identify or self-concept (such as being striking or mesmerizing).

## Implications

Body shaming can be fought on three fronts: 1) By the individual being attacked, 2) by supporters (health professionals, parents, and peers), and 3) by the institution in which the shaming occurs. First, for an individual who may be vulnerable to body shaming, knowing that there are some predictable categories of comments that are universally hurtful could be reassuring. It shows that the person is not isolated in the way they are attacked and what is said. Knowing that there are many people who have gone through the same type of shaming and who have recovered could make a person feel less alone and more hopeful.

Second, for supporters – health professionals, parents, and peers – it should be helpful to know what specific types of helpful words and what categories of comments might be most memorable and useful to the recovery of their loved one. This is important for anyone who has ever thought “What can I say?” Knowing these categories of helpful words, can give them confidence in stimulating what might be most helpful to the

specific case of their loved one. They are not helpless and what they say can have a lasting impression (32).

Interestingly, the types of comments body shamed people remembered as most helpful to their recovery can be useful for help professionals, parents, and peers as they prepare for an empowering discussion with a body shamed person. The Appendix is a worksheet titled “Words that that Help Heal Body Shaming.” Supporters can use it to think more carefully about which of the three approaches and which particular words could be useful when preparing for a conversation with a patient or a loved one.

Third, because schools are one common area where in-person body shaming can occur, they can also be a context where these body shaming discussions could occur.

Counselors, nurses, teachers, and lunch staff, could be given easy-to-remember guidance on the types of words (comparisons and derogatory names) that are hurtful and the types of words (and strategies) that can be memorable or helpful in recovery (see Appendix).

Most easily, giving these front-line workers a basic framework – such as “Recognize and Reframe” – could be useful in stopping body shaming and in helping comfort those who are hurt. In a bigger way, lunchrooms themselves can be altered in ways that help students eat healthier (33–36).

## **Limitations and Future Research**

This exploratory study usefully highlights several topics that have been missing from earlier literature. Most of those who took this survey were college-aged people who were

body shamed during adolescence. Given their closeness to this emotional issue, they could have had the tendency to either exaggerate or underplay (repress) what really happened.

Additionally, this is not a random sample. This population represents a well-educated group sample compared to the larger pool of those who are body shamed. Being well-educated might moderate some of the identity problems associated with being body shamed if it enables a person to build upon a professional identity. That is, success in one area (such as in a profession) could help ameliorate one's feelings of shortcoming because they were body shamed.

This research shows the importance of capturing the experiences of body shamed people to better understand what might help to heal body shaming: how they dealt with the shamers, what self-talk worked best for them, and how they were able to heal and move on. There is a great deal of power in analyzing their open-ended answers with an eye toward providing specific roadmaps and tools to help others in moving forward (37).

## Conclusion

Body shaming, weight shaming, and bullying can scar a person for life. These results give insights for immediate action. These results show supporter – health professionals, parents, and peers – the ways they can *reframe negative words* to focus on new or unrelated physical features. They show them how to make *impact-related comments* that

## What Words Hurt and Heal?

emphasize how a physical feature influences others (such one’s eyes or smile that “lights up the room”). They also show how *identity-related comments* can be used to positively redefine one’s physical identify or self-concept (such as striking or mesmerizing). With an increase in childhood obesity, body shaming may become even more severe.

Hopefully the words here and that can be generated from the worksheet in the Appendix can help.



## References

1. Gam RT, Singh SK, Manar M, Kar SK, Gupta A. Body shaming among school-going adolescents: prevalence and predictors. *Int J Community Med Public Health*. 2020 Mar 26;7(4):1324.
2. Schlüter C, Kraag G, Schmidt J. Body Shaming: an Exploratory Study on its Definition and Classification. *Int J Bullying Prev* [Internet]. 2021 Nov 9 [cited 2022 Sep 4]; Available from: <https://link.springer.com/10.1007/s42380-021-00109-3>
3. Ali MM, Fang H, Rizzo JA. Body weight, self-perception and mental health outcomes among adolescents. *J Ment Health Policy Econ*. 2010 Jun;13(2):53–63.
4. Green M, Lankford RD. *Body Image and Body SHaming*. Greenhaven Publishing LLC; 2016.
5. Maiano C, Ninot G, Bilard J. Age and Gender Effects on Global Self-Esteem and Physical Self-Perception in Adolescents. *Eur Phys Educ Rev*. 2004 Feb;10(1):53–69.
6. Bryson SL, Brady CM, Childs KK, Gryglewicz K. A Longitudinal Assessment of the Relationship Between Bullying Victimization, Symptoms of Depression, Emotional Problems, and Thoughts of Self-Harm Among Middle and High School Students. *Int J Bullying Prev*. 2021 Sep;3(3):182–95.
7. Lunde C, Frisen A. On being victimized by peers in the advent of adolescence: Prospective relationships to objectified body consciousness. *Body Image*. 2011 Sep;8(4):309–14.
8. Romano I, Butler A, Patte KA, Ferro MA, Leatherdale ST. High School Bullying and Mental Disorder: an Examination of the Association with Flourishing and Emotional Regulation. *Int J Bullying Prev*. 2020 Dec;2(4):241–52.
9. Bevelander KE, Kaipainen K, Swain R, Dohle S, Bongard JC, Hines PDH, et al. Crowdsourcing Novel Childhood Predictors of Adult Obesity. Barengo NC, editor. *PLoS ONE*. 2014 Feb 5;9(2):e87756.
10. Clare MM, Ardron-Hudson EA, Grindell J. Fat in School: Applied Interdisciplinarity as a Basis for Consultation in Oppressive Social Context. *J Educ Psychol Consult*. 2015 Jan 2;25(1):45–65.

11. Wang Y, Wang X, Yang J, Zeng P, Lei L. Body Talk on Social Networking Sites, Body Surveillance, and Body Shame among Young Adults: The Roles of Self-Compassion and Gender. *Sex Roles*. 2020 Jun;82(11–12):731–42.
12. Conoley JC. Sticks and Stones Can Break My Bones and Words Can Really Hurt Me. *Sch Psychol Rev*. 2008 Jun 1;37(2):217–20.
13. Orr T. *Combatting Body Shaming*. New York: Rosen Publishing; 2017.
14. Chomet N. *Coping with Body Shaming*. New York: The Rosen Publishing Group; 2017.
15. deLara EW. Consequences of Childhood Bullying on Mental Health and Relationships for Young Adults. *J Child Fam Stud*. 2019 Sep;28(9):2379–89.
16. Furman K, Thompson JK. Body image, teasing, and mood alterations: An experimental study of exposure to negative verbal commentary. *Int J Eat Disord*. 2002 Dec;32(4):449–57.
17. Menzel JE, Schaefer LM, Burke NL, Mayhew LL, Brannick MT, Thompson JK. Appearance-related teasing, body dissatisfaction, and disordered eating: A meta-analysis. *Body Image*. 2010 Sep;7(4):261–70.
18. Novitasari E, Hamid AYS. The relationships between body image, self-efficacy, and coping strategy among Indonesian adolescents who experienced body shaming. *Enferm Clínica*. 2021 Apr;31:S185–9.
19. Howard MS, Medway FJ. Adolescents' attachment and coping with stress. *Psychol Sch*. 2004 Mar;41(3):391–402.
20. Iannaccone M, D'Olimpio F, Cella S, Cotrufo P. Self-esteem, body shame and eating disorder risk in obese and normal weight adolescents: A mediation model. *Eat Behav*. 2016 Apr;21:80–3.
21. Duarte C, Pinto-Gouveia J. The impact of early shame memories in Binge Eating Disorder: The mediator effect of current body image shame and cognitive fusion. *Psychiatry Res*. 2017 Dec;258:511–7.
22. Brewis A, Bruening M. Weight Shame, Social Connection, and Depressive Symptoms in Late Adolescence. *Int J Environ Res Public Health*. 2018 May 1;15(5):891.
23. Buckels EE, Trapnell PD, Paulhus DL. Trolls just want to have fun. *Personal Individ Differ*. 2014 Sep;67:97–102.
24. Edwards NM, Pettingell S, Borowsky IW. Where Perception Meets Reality: Self-Perception of Weight in Overweight Adolescents. *Pediatrics*. 2010 Mar 1;125(3):e452–8.

25. Bharathi TA, Sreedevi P. A study on the self-concept of adolescents. *Int J Sci Res.* 2016;5(10):512–6.
26. Preckel F, Niepel C, Schneider M, Brunner M. Self-concept in adolescence: A longitudinal study on reciprocal effects of self-perceptions in academic and social domains. *J Adolesc.* 2013 Dec;36(6):1165–75.
27. Salmivalli C. Intelligent, Attractive, Well-Behaving, Unhappy: The Structure of Adolescents' Self-Concept and Its Relations to Their Social Behavior. *J Res Adolesc.* 1998 Jul;8(3):333–54.
28. Stodden DF, Goodway JD, Langendorfer SJ, Robertson MA, Rudisill ME, Garcia C, et al. A Developmental Perspective on the Role of Motor Skill Competence in Physical Activity: An Emergent Relationship. *Quest.* 2008 May;60(2):290–306.
29. Wansink B, Wansink V. *Body Shaming, Fat Bullying, and Their Long-term Consequences.* Ithaca, NY; 2023.
30. Cassidy W, Jackson M, Brown KN. Sticks and Stones Can Break My Bones, But How Can Pixels Hurt Me?: Students' Experiences with Cyber-Bullying. *Sch Psychol Int.* 2009 Aug;30(4):383–402.
31. Cash TF. Developmental about Physical Appearance: Retrospective Descriptions and relationships with body image. *Soc Behav Personal Int J.* 1995 Jan 1;23(2):123–30.
32. Wansink B, Latimer LA, Pope L. “Don’t eat so much:” how parent comments relate to female weight satisfaction. *Eat Weight Disord - Stud Anorex Bulim Obes.* 2017 Sep;22(3):475–81.
33. Greene KN, Gabrielyan G, Just DR, Wansink B. Fruit-Promoting Smarter Lunchrooms Interventions: Results From a Cluster RCT. *Am J Prev Med.* 2017 Apr;52(4):451–8.
34. Hanks AS, Just DR, Wansink B. Smarter Lunchrooms Can Address New School Lunchroom Guidelines and Childhood Obesity. *J Pediatr.* 2013 Apr;162(4):867–9.
35. Hubbard KL, Bandini LG, Folta SC, Wansink B, Eliasziw M, Must A. Impact of a Smarter Lunchroom intervention on food selection and consumption among adolescents and young adults with intellectual and developmental disabilities in a residential school setting. *Public Health Nutr.* 2015 Feb;18(2):361–71.
36. Just DR, Wansink B, Just DR, Wansink B. Smarter Lunchrooms: Using Behavioral Economics to Improve Meal Selection. 2009 [cited 2023 Jan 23]; Available from: <https://ageconsearch.umn.edu/record/94315>
37. Wansink V, Wansink B, *Body Shaming and Bullying: Memorable Comments From Bullies and from Supporters, forthcoming, Intl J Child Health Human Devlpmt*

## APPENDIX:

### Words that that Help Heal Body Shaming Worksheet

People who have recovered from being body shamed often point to helpful comments people made to them. This worksheet helps you identify which of three different approaches in offering helpful words might be most useful to someone who has been body shamed.

---

#### 1. How Can the Hurtful Comment be Reframed in a Positive Way to this Person?

Examples:

Hurtful Words

• Fat

→

Reframe Hurtful Words to Helpful Words

• Female: Curvy, feminine, healthy, or \_\_\_\_\_  
• Male: Solid, stocky, big, or \_\_\_\_\_

• Skinny

→

• Female: Graceful, slender, delicate, or \_\_\_\_\_  
• Male: Lean, slim, chiseled, or \_\_\_\_\_

---

#### 2. Which of their Physical Features Influences Other People Positively (or is Envied)?

Examples:

- Your eyes light up a room
- Your voice is so beautiful or comforting to people
- People love how feminine your hands are
- You have such amazing hair
- Your smile brightens people's days
- \_\_\_\_\_

---

#### 3. What Word Positively Describes Them in a Way They Don't Yet See

Examples:

- Mesmerizing, glowing, classic, striking, exotic, radiant, calming
- \_\_\_\_\_
